# Supplementary material for: Breast cancer sensitivity to neoadjuvant therapy in BRCA1 and CHEK2 mutation carriers and non-carriers
Source: Springer Nature journal article supplement (doi:10.1007/s10549-014-3206-1), 2014-11-21
Supplement: MOESM2 [file 8846762]

## Sheet: Лист1
							Supplementary Table 2. Description of individual patients
ID	ER	PgR	HER2	Triple-neg	age	stage	T	N	M	Histology	Grade	Clinical response	Pathological response	Therapy	Number of cycles	Radiation therapy	BRCA1/CHEK2 mutation	Designation of chemotherapy regimen
1	nd	nd	nd	nd	46	IIa	2	1	0	nd	nd	PR	PR	FAC	4		no	A
3	nd	nd	nd	nd	38	IIIb	4	3	0	nd	nd	SD	SD	FEC	6	yes	no	A
4	nd	nd	nd	nd	43	IIIa	2	2	0	nd	nd	PR	CR	FAC	4		no	A
5	nd	nd	nd	nd	46	IIIa	2	2	0	IDC	nd	SD	PR	FAC	3		no	A
6	nd	nd	nd	nd	41	IIIa	3	1	0	IDC	G1	SD	PR	FAC	4		no	A
7	nd	nd	nd	nd	39	IIa	2	2	0	nd	nd	SD	SD	FAC	4		no	A
8	nd	nd	nd	nd	42	IIIa	2	2	0	IDC	G3	PR	SD	FAC	4		no	A
10	neg	neg	neg	yes	32	IIa	2	2	0	nd	nd	PR	PR	FAC	2		no	A
13	nd	nd	nd	nd	49	IIIa	2	2	0	Medullary	nd	PR	PR	FAC	4		no	A
15	pos	neg	nd	no	47	IIIb	4	1	0	IDC	nd	PR	PR	FAC	4		no	A
16	nd	nd	nd	nd	43	IIIb	4	2	0	nd	nd	PR	PR	FEC	6	yes	no	A
17	nd	nd	nd	nd	50	IIIa	2	2	0	nd	nd	PR	PR	FAC	4		no	A
19	neg	neg	pos	no	46	IIIb	4	2	0	nd	nd	PR	PR	EC	9		no	A
20	nd	nd	nd	nd	31	IIb	2	2	0	IDC	G3	SD	PR	FAC	4		no	A
24	nd	nd	nd	nd	35	IIIb	4	1	0	nd	nd	PR	PR	FAC	8	yes	no	A
25	nd	nd	nd	nd	30	IIIb	4	2	0	nd	nd	CR	CR	FAC	6		no	A
26	nd	nd	nd	nd	30	IIIb	4	1	0	nd	nd	PR	PR	CAMF	4		no	A
28	nd	nd	nd	nd	45	III	4	1	0	nd	nd	PR	PR	FAC	3		no	A
30	nd	nd	nd	nd	42	IIIb	4	2	0	nd	nd	CR	CR	FAC	4		no	A
31	nd	nd	nd	nd	47	IIIa	3	1	0	nd	nd	PR	PR	FAC	3		no	A
32	nd	nd	nd	nd	42	IIIa	2	2	0	nd	nd	PR	PR	FAC	4		no	A
33	pos	pos	neg	no	36	IIIa	3	1	0	nd	nd	SD	PR	FAC	6	yes	no	A
37	nd	nd	nd	nd	49	IIb	2	1	0	nd	nd	CR	RP	FAC	5		no	A
38	nd	nd	nd	nd	47	IIIa	2	2	0	nd	nd	PR	SD	FAC	4		no	A
40	nd	nd	nd	nd	45	IIIb	4	1	0	nd	nd	PR	PR	FAC	4		no	A
41	nd	nd	nd	nd	40	IIIb	4	1	0	ILC	nd	PR	PR	FAC	2		no	A
44	pos	pos	neg	no	35	IIIb	4	2	0	IDC	G3	SD	SD	FAC	4		CHEK2	A
47	nd	nd	nd	nd	45	IIIa	3	1	0	nd	nd	PR	PR	FAC	4	yes	no	A
48	nd	nd	nd	nd	44	IIIa	3	2	0	IDC	G3	PR	PR	FAC	4		no	A
49	nd	nd	nd	nd	37	IIIa	3	2	0	IDC	nd	PR	PR	FAC	3		no	A
51	nd	nd	nd	nd	47	IIb	2	1	0	nd	nd	CR	CR	CMF, FAC	3 and 5	yes	no	A
52	pos	neg	neg	no	49	IIIb	3	1	0	IDC	G2	PR	PR	FAC	4		no	A
54	nd	nd	nd	nd	46	IIIb	4	1	0	nd	nd	PR	PR	FAC	5		no	A
55	nd	nd	nd	nd	46	IIb	2	1	0	nd	nd	PR	SD	FAC	4		no	A
56	pos	neg	neg	no	44	IIIa	2	2	0	nd	nd	SD	SD	FAC	3		no	A
59	pos	neg	neg	no	49	IIb	2	1	0	IDC	G3	PD	PR	FAC	3		CHEK2	A
60	pos	neg	neg	no	37	IIIa	2	2	0	nd	nd	CR	CR	FEC	6		no	A
63	nd	nd	nd	nd	44	IIIb	4	0	0	nd	nd	SD	SD	FAC	2		no	A
64	nd	nd	nd	nd	47	IIIa	2	2	0	Mucionous	nd	PR	PR	FAC	6		no	A
65	neg	neg	pos	no	40	IIIb	4	0	0	IDC	nd	SD	PR	FAC	3		CHEK2	A
66	nd	nd	nd	nd	42	IIb	3	0	0	nd	nd	PR	CR	FAC	4		no	A
67	nd	nd	nd	nd	49	IIIa	3	1	0	IDC	nd	PR	PR	FAC	4		no	A
69	nd	nd	nd	nd	35	IIIa	2	2	0	IDC	nd	PR	PR	FAC	4		no	A
71	pos	pos	neg	no	45	IIIb	4	2	0	nd	nd	PR	PR	FAC	4		no	A
72	nd	nd	nd	nd	47	IIb	2	1	0	IDC	G2	PR	PR	FAC	4		no	A
74	nd	nd	nd	nd	48	IIIa	1	2	0	nd	G3	PR	SD	FAC	5		no	A
75	nd	nd	nd	nd	37	IIIb	4	2	0	nd	nd	CR	CR	FAC	4		no	A
76	neg	neg	neg	yes	48	IIIb	4	1	0	nd	G1	PR	PR	FAC	6		no	A
78	pos	neg	neg	no	47	IIIb	4	0	0	nd	nd	PR	CR	FAC	7		no	A
79	nd	nd	nd	nd	49	IIIb	4	2	0	nd	nd	PR	PR	FAC	6		no	A
80	nd	nd	nd	nd	49	IIIb	4	3	0	nd	nd	PR	CR	FAC	6		no	A
83	nd	nd	nd	nd	50	IIIb	4	2	0	nd	nd	PR	PR	FAC	5	yes	no	A
86	nd	nd	nd	nd	43	IIIa	3	1	0	IDC	G2	PR	PR	FAC	4		no	A
87	pos	pos	neg	no	46	IIIb	4	1	0	IDC	G2	PR	PR	FAC	6		no	A
88	neg	neg	neg	yes	46	IIIa	1	2	0	IDC	nd	SD	PR	FAC	6	yes	BRCA1	A
89	neg	pos	neg	no	49	IIa	2	0	0	IDC	G2	PR	PR	FAC	4		no	A
90	neg	neg	neg	yes	43	IIIa	3	2	0	IDC	G2	PR	PR	FAC	6		no	A
93	pos	pos	neg	no	45	IIIb	4	2	0	nd	nd	PR	PR	FAC	4	yes	no	A
94	neg	neg	neg	yes	48	IIIb	4	1	0	IDC	nd	PR	PR	FAC	4		no	A
95	neg	neg	neg	yes	39	IIIa	2	2	0	nd	nd	PR	CR	FAC	4		no	A
98	neg	neg	neg	yes	43	IIIa	3	2	0	IDC	G3	PR	PR	FEC	4		no	A
99	pos	pos	neg	no	36	IIIb	4	1	0	IDC	G2	PR	PR	FEC	6		no	A
101	nd	nd	nd	nd	47	IIIb	4	2	0	nd	nd	PR	PR	FAC	6		no	A
102	neg	neg	neg	yes	33	IIb	2	1	0	nd	nd	CR	CR	FAC	4		no	A
103	neg	neg	pos	no	34	IIb	2	1	0	nd	nd	PR	PR	FAC	3		no	A
104	pos	neg	neg	no	36	IIIa	3	2	0	nd	G3	PR	PR	FEC	4		no	A
106	pos	pos	neg	no	43	IIb	2	1	0	ILC	G2	PR	PR	FEC	4		no	A
110	neg	neg	neg	yes	47	IIb	2	1	0	IDC	G2	PR	PR	FEC	3		no	A
113	nd	nd	nd	nd	50	IIb	2	0	0	IDC	G2	SD	SD	FEC	4		no	A
114	pos	pos	neg	no	43	IV	4	1	0	IDC	G2	PR	PR	FAC	4		no	A
116	neg	neg	neg	yes	43	IIb	2	1	0	IDC	nd	CR	CR	FAC	4		BRCA1	A
117	neg	neg	neg	yes	27	IIIb	2	2	0	IDC	G2	PR	PR	FAC	4		BRCA1	A
118	pos	pos	neg	no	46	IIIa	3	1	0	IDC	G2	PR	PR	FEC	4		no	A
124	pos	pos	neg	no	47	IIa	2	0	0	IDC	G3	PR	PR	FAC	4		no	A
126	neg	neg	neg	yes	46	IIIa	3	1	0	IDC	G2	PR	PR	FEC	3		no	A
127	nd	nd	nd	nd	47	IIIa	3	2	0	nd	nd	PR	PR	FEC	6		no	A
128	neg	neg	neg	yes	31	IIIa	2	2	0	IDC	G3	PR	PR	FEC	4		BRCA1	A
130	nd	nd	nd	nd	47	IIIb	4	1	0	nd	nd	PR	PR	FAC	6		no	A
131	neg	neg	neg	yes	48	IIIb	4	2	0	nd	nd	PR	PR	FEC	6		no	A
133	pos	pos	neg	no	45	IIIb	4	2	0	nd	nd	PR	CR	FEC	6		no	A
134	nd	nd	nd	nd	43	IIIa	3	2	0	IDC	G2	PR	PR	FAC	6		no	A
136	nd	nd	nd	nd	50	IIIb	4	2	0	nd	nd	SD	PR	FAC	11	yes	no	A
137	neg	neg	pos	no	26	IIIa	2	2	0	nd	nd	SD	SD	FAC	4		no	A
139	pos	neg	nd	no	50	IIIa	3	1	0	nd	nd	PR	PR	FAC	4		no	A
140	nd	nd	nd	nd	45	IIb	2	1	0	mixed (IDC, ILC)	G1,G2	PR	PR	FEC	4		no	A
141	pos	pos	neg	no	50	IIIa	2	2	0	IDC	G2	PR	PR	FAC	4		no	A
142	pos	neg	neg	no	38	IIb	2	1	0	IDC	nd	PR	PR	FAC	4		no	A
143	pos	pos	pos	no	41	IIb	2	1	0	IDC	G1	PR	PR	FAC	4		no	A
144	pos	pos	neg	no	50	IIIb	4	0	0	nd	nd	PR	PR	FEC	6		no	A
145	pos	pos	neg	no	49	IIIb	4	1	0	IDC	G1	PR	PR	FEC	6		no	A
148	pos	pos	neg	no	47	IIIa	3	1	0	ILC	G2	SD	SD	AC, FAC	3 and 3		no	A
149	pos	pos	neg	no	49	IIIb	4	1	0	nd	nd	PR	PR	FEC	6	yes	no	A
152	pos	pos	neg	no	42	IIb	2	1	0	IDC	G2	PR	SD	FAC	5		no	A
154	neg	neg	neg	yes	45	IIb	2	1	0	IDC	G2	PR	PR	FEC	4		no	A
155	pos	neg	neg	no	49	IIIb	4	2	0	nd	nd	PR	PR	FAC	4		no	A
161	pos	pos	neg	no	45	IV	4	2	1	IDC	G2	PR	PR	FEC	6	yes	CHEK2	A
163	nd	nd	nd	nd	49	IIIa	3	1	0	IDC	nd	PR	PR	FEC	4		no	A
164	pos	pos	neg	no	49	IIIa	3	2	0	nd	nd	SD	SD	FAC	4		no	A
165	nd	nd	nd	nd	49	IIIa	3	2	0	nd	nd	PR	CR	FAC	4	yes	no	A
166	nd	nd	nd	nd	42	IIb	2	2	0	nd	nd	CR	CR	FAC	3		no	A
168	nd	nd	nd	nd	47	IIIb	4	2	0	nd	nd	PR	PR	FAC	5		no	A
169	pos	pos	neg	no	49	IIIa	2	2	0	IDC	nd	PR	PR	FAC	4		no	A
170	pos	pos	neg	no	49	IIIb	4	1	0	IDC	G3	PR	PR	FEC	6		no	A
172	pos	neg	neg	no	45	IIIa	2	2	0	IDC	G2	PR	PR	FAC	7		no	A
174	nd	nd	nd	nd	37	IIa	2	0	0	nd	nd	SD	SD	FAC	2		no	A
175	neg	neg	pos	no	47	IIIa	3	1	0	nd	nd	PR	PR	FAC	2	yes	no	A
176	pos	pos	nd	no	48	IIIb	4	2	0	ILC	nd	PR	PR	FAC	6		no	A
178	neg	neg	neg	yes	50	IIIa	2	2	0	IDC	nd	CR	CR	FAC	4		BRCA1	A
179	nd	nd	nd	nd	44	IIa	3	2	0	nd	nd	PR	PR	FAC	3		no	A
180	pos	pos	neg	no	46	IIIb	4	2	0	nd	nd	CR	CR	FAC	4		no	A
181	pos	pos	neg	no	43	IIIb	4	2	0	IDC	G2	PR	PR	FEC	6		no	A
182	nd	nd	nd	nd	46	IIIb	4	2	0	nd	nd	PR	PR	FAC	2		no	A
188	neg	neg	neg	yes	48	IIIb	4	2	0	nd	nd	PR	CR	FEC	6		no	A
190	nd	nd	nd	nd	43	IIIb	4	0	0	IDC	G3	SD	PR	FAC	2		no	A
192	pos	neg	neg	no	45	IIIa	3	2	0	IDC	nd	PR	PR	FAC	6		no	A
195	pos	pos	neg	no	37	IIa	2	0	0	IDC	G2	PR	PR	FAC	4		no	A
196	pos	pos	neg	no	39	IIIb	4	2	0	IDC	G2	PR	PR	FEC	6		no	A
197	pos	pos	neg	no	36	IIIb	3	2	0	IDC	G3	PR	PR	FEC	6		no	A
198	pos	pos	neg	no	48	IIa	2	0	0	IDC	nd	PR	PR	FAC	4		no	A
201	pos	pos	neg	no	36	IV	2	1	1	nd	nd	PR	PR	FAC	6		no	A
208	pos	pos	neg	no	38	IIIa	3	2	0	nd	nd	PR	PR	FAC	3	yes	no	A
210	pos	pos	neg	no	49	IV	1	0	1	nd	nd	SD	SD	FEC	4		no	A
224	pos	pos	nd	no	32	IIb	2	1	0	nd	nd	SD	SD	FAC	6		no	A
227	nd	nd	nd	nd	44	IIb	2	1	0	IDC	G2	PR	PR	FAC	4		no	A
228	nd	nd	nd	nd	46	IIb	2	1	0	nd	nd	SD	SD	FAC	5	yes	no	A
229	pos	pos	neg	no	49	IIIb	4	3	0	nd	nd	SD	SD	FAC + goserelin	6	yes	no	A
230	pos	pos	neg	no	38	IIa	2	0	0	Mucionous	G2	PR	SD	FAC	3		no	A
234	pos	pos	neg	no	50	IIIa	2	2	0	IDC	G2	PR	PR	FAC	2		no	A
236	neg	neg	neg	yes	37	IIIb	4	2	0	IDC	G3	PR	PR	FEC	6		no	A
238	pos	neg	neg	no	48	IIb	2	1	0	Mucionous	G2	PR	PR	FEC	4		no	A
241	pos	pos	neg	no	44	IIIb	3	3	0	IDC	G3	PR	PR	FAC	6		no	A
244	neg	neg	neg	yes	46	IIIa	4	2	0	nd	nd	PD	PD	FAC	2		no	A
246	neg	neg	pos	no	45	IIIb	4	2	0	nd	nd	PR	PR	FAC	4		no	A
247	nd	nd	nd	nd	48	IIIb	4	2	0	nd	nd	PR	PR	FEC	6		no	A
248	pos	pos	neg	no	34	IIIb	4	2	0	IDC	G3	PR	PR	FAC	5		no	A
249	nd	nd	nd	nd	45	IIIb	4	0	0	nd	nd	PR	PR	FAC	6		no	A
250	neg	neg	neg	yes	43	IIIb	4	2	0	nd	G3	PR	PR	FEC	6		no	A
253	neg	neg	neg	yes	44	I	1	0	0	IDC	G3	SD	PR	FAC	4		no	A
258	neg	neg	neg	yes	44	IIIb	4	0	0	IDC	G2	PR	PR	FAC	4		no	A
260	neg	neg	neg	yes	40	IIIa	3	1	0	nd	nd	PR	PR	FAC	3		no	A
262	nd	nd	nd	nd	48	IIIb	4	3	0	nd	nd	PR	PR	FAC	5		no	A
263	pos	neg	neg	no	45	IIb	2	1	0	nd	nd	PR	PR	FAC	4		no	A
272	nd	nd	nd	nd	49	IIIb	4	1	0	nd	nd	CR	CR	FAC	6	yes	no	A
274	neg	neg	neg	yes	43	IIa	1	1	0	ILC	G3	PR	PR	FEC	3		no	A
275	nd	nd	nd	nd	46	IIIa	3	2	0	nd	nd	PR	CR	FAC	2		no	A
277	pos	pos	neg	no	45	IIIa	3	1	0	nd	nd	PR	PR	FAC	4		no	A
279	pos	neg	neg	no	50	IIIb	4	1	0	nd	G3	PR	PR	FAC	4		no	A
280	neg	neg	neg	yes	31	IIIb	4	1	0	nd	nd	CR	CR	FEC	6		no	A
282	pos	pos	pos	no	36	IIb	3	0	0	IDC	G1	PR	PR	FAC + herceptin	4		no	A
285	neg	pos	neg	no	42	IIIb	4	1	0	nd	nd	PR	PR	FEC	6		no	A
287	pos	pos	neg	no	39	IIIa	3	1	0	IDC	G2	PR	PR	FAC	4		no	A
288	pos	pos	neg	no	44	IIIa	2	2	0	IDC	nd	PR	PR	FEC	4		no	A
290	pos	pos	neg	no	45	IIIb	4	2	0	nd	G3	PR	PR	FAC	3		no	A
291	neg	neg	neg	yes	44	IIIa	3	2	0	IDC	G3	PR	PR	FEC	6		no	A
292	neg	neg	pos	no	36	IIIa	3	2	0	IDC	G3	PR	PR	FEC	6	yes	no	A
293	pos	pos	neg	no	45	IIIa	3	1	0	ILC	G2	PR	PR	FAC	4		no	A
295	neg	neg	neg	yes	35	IIIa	3	1	0	IDC	G3	PR	PR	FAC	4		no	A
296	pos	pos	pos	no	47	IIIb	4	1	0	nd	nd	PR	PR	FEC	4	yes	no	A
299	pos	pos	neg	no	43	IIIa	3	1	0	DCIS	nd	PR	PR	FAC	4		no	A
300	pos	neg	pos	no	47	IIIb	4	1	0	IDC	G3	PR	PR	FEC	6		no	A
307	neg	neg	neg	yes	49	IIIa	2	2	0	nd	nd	PR	CR	FEC	6		BRCA1	A
309	pos	pos	pos	no	43	IIIa	3	1	0	nd	nd	PR	PR	FAC	6		no	A
311	neg	neg	neg	yes	40	IIIb	4	2	0	nd	nd	SD	PR	FEC	6		no	A
313	nd	nd	nd	nd	48	IIIa	2	2	0	IDC	G3	PR	PR	FAC	4		no	A
315	neg	neg	neg	yes	48	IIIb	4	0	0	nd	nd	PR	PR	FAC	5		no	A
316	nd	nd	nd	nd	42	IIIa	3	2	0	nd	nd	PR	PR	FAC	6		no	A
317	nd	nd	nd	nd	36	IIb	2	1	0	IDC	G2	PR	PR	FAC	3		no	A
318	nd	nd	nd	nd	50	IIb	2	1	0	IDC	nd	PR	PR	FAC	3		no	A
319	nd	nd	nd	nd	42	IIIa	2	2	0	nd	nd	PR	PR	FAC	5		no	A
320	nd	nd	nd	nd	48	IIIb	4	2	0	nd	nd	PR	PR	FAC	6		no	A
321	nd	nd	nd	nd	48	IIIb	4	1	0	nd	G3	PR	PR	FAC	6		no	A
323	pos	pos	neg	no	47	IIb	2	1	0	IDC	G1	PR	PR	FAC	6		no	A
325	nd	nd	nd	nd	48	IIIb	4	1	0	IDC	G2	SD	PR	FAC	6		no	A
327	nd	nd	nd	nd	48	IIIb	4	2	0	nd	nd	PR	PR	FAC	3		no	A
328	pos	pos	nd	no	47	IIIb	4	2	0	IDC	G1	PR	PR	FAC	6		no	A
329	nd	nd	nd	nd	49	IIIb	4	2	0	nd	nd	PR	PR	FAC	6		no	A
330	nd	nd	nd	nd	40	IIIa	2	2	0	nd	nd	CR	CR	FAC	6		no	A
331	nd	nd	nd	nd	50	IIIb	4	1	0	nd	G2	PR	PR	FAC	6		no	A
333	nd	nd	nd	nd	39	IIb	2	1	0	nd	nd	PR	CR	FAC	3		BRCA1	A
336	nd	nd	nd	nd	44	IIIb	4	1	0	nd	nd	PR	PR	FAC	3		no	A
337	pos	pos	neg	no	31	IIIa	3	1	0	IDC	G2	PR	PR	FAC	6		no	A
338	nd	nd	nd	nd	34	IIIb	4	2	0	nd	nd	PR	PR	CMF, FAC	3 and 3		no	A
340	neg	pos	neg	no	43	IIIa	2	2	0	IDC	G3	PR	PR	FAC	4		no	A
341	nd	nd	nd	nd	28	IIb	3	0	0	nd	nd	PR	PR	FAC	4		no	A
342	nd	nd	nd	nd	37	IIIb	4	1	0	IDC	G3	PR	PR	FAC	4		no	A
343	nd	nd	nd	nd	46	IIIb	4	1	0	nd	nd	PR	PR	FAC	5		no	A
344	nd	nd	nd	nd	40	IIIa	2	2	0	nd	nd	SD	SD	FAC	6		no	A
345	nd	nd	nd	nd	43	IIIb	4	1	x	nd	nd	PR	PR	FAC	4		no	A
347	nd	nd	nd	nd	36	IIb	2	1	0	nd	nd	PR	PR	FAC	3		no	A
348	nd	nd	nd	nd	43	IIIb	4	2	0	IDC	G2	PR	PR	FAC	3		no	A
349	nd	nd	nd	nd	44	IIIb	4	2	0	nd	nd	PR	PR	FAC	6		no	A
350	nd	nd	nd	nd	37	IIIa	3	1	0	nd	nd	PR	PR	FAC	4		no	A
351	pos	pos	neg	no	35	IIIa	2	2	0	nd	nd	PR	SD	FAC	6		no	A
352	nd	nd	nd	nd	46	IIIa	3	2	0	IDC	G2	PR	SD	FAC	5		no	A
353	nd	nd	nd	nd	43	IIIa	3	1	0	nd	nd	PR	PR	FAC	6	yes	no	A
354	pos	pos	neg	no	47	IIIa	3	1	0	IDC	nd	PR	PR	FAC	4		no	A
357	pos	pos	nd	no	47	IIIa	4	1	0	IDC	nd	PR	PR	FAC	5		no	A
358	nd	nd	nd	nd	40	IIIa	2	2	0	nd	nd	PR	PR	FAC	3		no	A
360	nd	nd	nd	nd	48	IIIa	3	1	0	IDC	G2	PR	PR	FAC	4		no	A
361	pos	pos	nd	no	47	IIIb	4	1	0	Tubular	G1	PR	PR	FAC	4		no	A
362	pos	pos	neg	no	49	IIIb	4	1	0	IDC	nd	PR	PR	EC	5		no	A
363	neg	neg	nd	nd	48	IIIb	4	1	0	IDC	G3	PR	PR	FAC	6		no	A
365	nd	nd	nd	nd	50	IIb	2	1	0	IDC	nd	PR	PR	FAC	3		no	A
366	nd	nd	nd	nd	48	IIIb	4	2	0	IDC	G3	PR	PR	FAC	6		no	A
367	nd	nd	nd	nd	42	IIIb	4	2	x	IDC	nd	SD	SD	FAC, capecitabine	5 and 4		no	A
369	nd	nd	nd	nd	50	IIb	2	1	0	nd	nd	SD	SD	FAC	3		no	A
370	nd	nd	nd	nd	43	IIIb	4	2	0	nd	nd	PR	PR	FAC	5		no	A
371	nd	nd	nd	nd	46	IIIa	2	2	0	nd	nd	PR	PR	FAC	3		no	A
372	neg	neg	neg	yes	47	IIIb	4	2	0	nd	nd	PR	PR	FAC	6		BRCA1	A
373	pos	pos	neg	no	43	IIIb	3	2	0	ILC	nd	PR	PR	FAC	4		no	A
374	nd	nd	nd	nd	47	IIIb	4	0	0	nd	nd	CR	CR	FAC	6		no	A
375	nd	nd	nd	nd	41	IIIa	2	2	0	IDC	nd	PR	SD	FAC	3		no	A
376	nd	nd	nd	nd	50	IIIb	4	2	0	IDC	G1	PR	PR	FAC	6		no	A
377	nd	nd	nd	nd	32	IIIa	3	1	0	nd	nd	PR	PR	FAC	2	yes	no	A
379	nd	nd	nd	nd	42	IIIb	4	2	0	nd	nd	PR	PR	FAC	6		no	A
380	nd	nd	nd	nd	43	IIIb	4	2	0	nd	nd	PR	PR	FAC	6		no	A
382	nd	nd	nd	nd	38	IIIa	2	2	0	Mucionous	nd	PR	SD	FAC	4		no	A
384	pos	pos	neg	no	45	IIIb	4	1	0	IDC	nd	PR	PR	FAC	5		no	A
385	nd	nd	nd	nd	46	IIIb	4	1	0	nd	nd	PR	CR	FAC	6		no	A
388	nd	nd	nd	nd	33	IIIa	2	2	0	IDC	G2	PR	PR	FAC	4		no	A
389	nd	nd	nd	nd	45	IIIb	4	2	0	nd	nd	PR	CR	FAC	4		no	A
393	nd	nd	nd	nd	41	IIIb	4	1	0	IDC	G2	PR	PR	CMF, CAMF	4 and 4		no	A
394	nd	nd	nd	nd	38	IIIa	2	2	0	nd	nd	CR	PR	FAC	3		no	A
395	nd	nd	nd	nd	45	IIIa	3	2	0	nd	nd	PR	CR	FAC	3		no	A
397	nd	nd	nd	nd	44	IIIb	4	2	0	nd	nd	PR	PR	FAC	5		no	A
399	nd	nd	nd	nd	42	IIIa	2	2	0	nd	nd	PR	PR	FAC	3		no	A
402	nd	nd	nd	nd	48	IIIb	4	2	0	nd	nd	PR	PR	FAC	4	yes	no	A
403	nd	nd	nd	nd	47	IIb	2	1	0	IDC	G3	PR	PR	FAC	3		no	A
404	nd	nd	nd	nd	42	IIIa	3	1	0	nd	nd	PR	PR	FAC	4		no	A
405	nd	nd	nd	nd	37	IIIa	3	1	0	IDC	nd	PR	SD	FAC	3		no	A
406	neg	neg	neg	yes	47	IIIa	2	2	0	nd	nd	PR	PR	FAC	4		no	A
407	nd	nd	nd	nd	36	IIIb	4	2	0	nd	nd	PR	CR	FEC	3		BRCA1	A
408	nd	nd	nd	nd	44	IIb	2	1	0	Medullary	nd	PR	PR	FAC	4		no	A
409	neg	neg	neg	yes	45	IIb	2	1	0	nd	nd	PR	CR	FAC	4		no	A
411	nd	nd	nd	nd	45	IIIa	3	1	0	IDC	G2	PR	PR	FAC	5		no	A
414	nd	nd	nd	nd	45	IIb	2	1	0	Tubular	nd	PR	PR	FAC	4		no	A
416	nd	nd	nd	nd	39	IIIb	4	2	0	nd	nd	PR	CR	FAC	3		no	A
419	nd	nd	nd	nd	47	IIIb	4	1	0	IDC	G2	SD	PR	FAC	8		no	A
422	neg	neg	neg	yes	46	IIIb	4	1	0	IDC	nd	PR	PR	FAC	4		no	A
423	pos	pos	neg	no	46	IIIb	4	1	0	DCIS	nd	CR	CR	FAC	4		no	A
424	neg	neg	neg	yes	45	IIIa	3	1	0	ILC	nd	PR	PR	FAC	3		no	A
426	pos	pos	neg	no	33	IIIa	3	2	0	mixed (IDC, ILC)	nd	PR	PR	FEC	6		no	A
432	neg	neg	pos	no	38	IIIa	2	2	0	IDC	G3	PR	PR	FEC	6		no	A
434	nd	nd	nd	nd	48	IIIa	3	1	0	nd	nd	SD	SD	FAC	3		no	A
435	nd	nd	nd	nd	44	IIa	2	0	0	Mucionous	nd	PR	PR	FAC	4		no	A
436	neg	neg	neg	yes	49	IIIa	3	2	0	nd	nd	PR	PR	FEC	4		no	A
438	nd	nd	nd	nd	43	IIIa	3	1	0	nd	nd	PR	PR	FAC	4		no	A
439	pos	pos	neg	no	40	IIIb	4	2	0	IDC	G3	PR	PR	FEC	6		no	A
440	nd	nd	nd	nd	49	IV	3	1	1	nd	nd	PR	PR	FAC	4		no	A
441	nd	nd	nd	nd	41	IIb	2	1	0	IDC	nd	PR	PR	CMF, FAC	2 and 2		no	A
443	neg	neg	pos	no	45	IIIb	4	2	0	nd	nd	PR	PR	FAC	3		no	A
444	nd	nd	nd	nd	45	IIIb	4	1	0	nd	nd	SD	SD	FAC	6	yes	no	A
445	neg	neg	neg	yes	49	IIIa	2	2	0	nd	nd	CR	CR	FAC	7		no	A
447	pos	pos	neg	no	37	IIIb	2	3	0	IDC	G2	PR	PR	FAC	2		no	A
448	pos	pos	neg	no	48	IIIa	3	2	0	nd	nd	SD	PR	FAC	4		no	A
449	nd	nd	nd	nd	47	IIIa	3	1	0	nd	nd	PR	PR	FAC	4		no	A
453	nd	nd	nd	nd	45	IIIb	4	2	0	IDC, mucous	G3	PR	PR	FAC	4		no	A
454	nd	nd	nd	nd	48	IIb	2	2	0	nd	nd	PR	PR	FAC	4		no	A
455	nd	nd	nd	nd	47	IIIb	4	1	0	nd	nd	PR	PR	FAC	5		no	A
1210	neg	neg	neg	yes	35	IIIb	3	1	0	nd	nd	PR	PR	EC	6	yes	no	A
14	nd	nd	nd	nd	47	IIIa	2	2	0	nd	nd	PR	PR	Capecitabine	2	yes	no	other
23	pos	pos	neg	no	35	IIIa	2	1	0	IDC	nd	PD	SD	CMF	1		no	other
27	pos	pos	neg	no	49	IIb	3	0	0	IDC	nd	PR	PR	CMF	2		BRCA1	other
29	nd	nd	nd	nd	48	IIb	2	1	0	IDC	nd	SD	SD	CMF	2		no	other
34	nd	nd	nd	nd	43	IIIb	4	1	0	nd	nd	PR	PR	CMF	4		no	other
42	nd	nd	nd	nd	50	IIIa	3	2	0	IDC	G2	PR	PR	CMF	2		no	other
53	nd	nd	nd	nd	50	IIIb	3	1	0	IDC	nd	SD	SD	CMF	2		no	other
58	nd	nd	nd	nd	49	IIa	2	0	0	IDC	nd	PR	PR	CMF	2		no	other
68	nd	nd	nd	nd	44	IIb	2	1	0	nd	nd	SD	CR	CMF	2		BRCA1	other
70	nd	nd	nd	nd	48	IIb	2	1	0	nd	nd	PR	PR	СMF	3		no	other
73	nd	nd	nd	nd	48	IIb	3	0	0	nd	nd	SD	SD	CMF	3	yes	no	other
81	pos	neg	pos	no	46	IIb	2	1	0	IDC	nd	SD	SD	CMF	2		no	other
151	pos	pos	neg	no	47	IIIb	4	1	0	nd	nd	SD	SD	Goserelin, goserelin + arimedex	4 and 5		no	other
171	pos	pos	neg	no	50	IIIa	3	2	0	nd	nd	SD	SD	Goserelin	4		no	other
245	pos	neg	neg	no	33	IIIa	2	3	0	IDC	G2	PR	PR	Goserelin	nd		CHEK2	other
286	pos	pos	pos	no	35	IIIa	3	1	0	IDC	G2	PD	PD	Capecitabine + herceptin + avastin	19		no	other
314	pos	pos	nd	no	41	IIb	2	1	0	nd	nd	PR	PR	CMF	2		no	other
324	nd	nd	nd	nd	50	IIb	2	1	0	IDC	nd	PR	PR	CMF	2		no	other
332	nd	nd	nd	nd	48	IIIa	3	1	0	nd	nd	PR	PR	CMF	3		no	other
334	nd	nd	nd	nd	43	IIb	2	1	0	nd	nd	SD	SD	CMF	1	yes	no	other
356	nd	nd	nd	nd	46	IIb	2	1	0	nd	nd	CR	CR	CMF	3		no	other
378	nd	nd	nd	nd	41	IIb	2	1	0	IDC	G3	PR	PR	CMF	3		no	other
381	nd	nd	nd	nd	43	IIa	2	0	0	IDC	nd	SD	SD	CMF	2		no	other
386	nd	nd	nd	nd	37	IIIa	3	1	0	nd	nd	PR	PR	CMF	4	yes	no	other
390	nd	nd	nd	nd	49	IIb	2	1	0	nd	nd	SD	SD	CMF	3		no	other
391	nd	nd	nd	nd	44	IIb	2	1	0	nd	G2	SD	SD	CMF	1		no	other
392	pos	pos	neg	no	35	IIIa	2	2	0	IDC	G2	PR	SD	CMF	3		no	other
412	nd	nd	nd	nd	48	I	1	0	0	IDC	nd	PR	SD	CMF	2		no	other
413	nd	nd	nd	nd	42	IIb	2	1	0	IDC	G3	SD	SD	Goserelin	nd		no	other
420	nd	nd	nd	nd	46	IIb	2	1	0	nd	nd	SD	SD	CMF	3		no	other
431	nd	nd	nd	nd	40	IIb	2	1	0	nd	nd	PR	PR	CMF	3		BRCA1	other
451	nd	nd	nd	nd	44	IIa	1	1	0	nd	nd	CR	CR	CMF	3		no	other
457	nd	nd	nd	nd	30	IIb	2	1	0	nd	nd	PR	PR	CMF	6		no	other
2	nd	nd	nd	nd	47	IIIb	4	1	0	IDC	G1	PR	PR	AT	4		no	T
9	pos	pos	neg	no	37	IIIa	3	1	0	nd	nd	SD	PR	AT	4		no	T
11	neg	neg	pos	no	45	IIIb	4	1	0	nd	nd	CR	CR	AT, paclitaxel, CMF	3 and 4 and 3		no	T
35	nd	nd	nd	nd	49	IIIa	3	1	0	nd	nd	PR	PR	AT	4		no	T
36	nd	nd	nd	nd	46	IIIa	3	1	0	nd	nd	PR	PR	AT	6		no	T
43	neg	neg	neg	yes	47	IIIa	2	2	0	IDC	nd	PR	PR	Vinorelbine + AC	3		BRCA1	T
57	pos	pos	neg	no	31	IIIa	3	1	0	IDC	G1	PR	PD	TAC	2		no	T
61	nd	nd	nd	nd	43	IIIb	4	1	0	nd	nd	PR	PR	AT, paclitaxel, CMF	3 and 4 and 3		no	T
62	nd	nd	nd	nd	35	IIIa	3	1	0	nd	nd	PR	PR	Vinorelbine + 5-fluoruracil	3		no	T
82	pos	pos	pos	no	46	IIIb	2	3	0	nd	nd	PR	CR	AT	4		no	T
84	neg	neg	neg	yes	37	IIb	2	1	0	nd	nd	CR	CR	TCbP	4		no	T
85	pos	pos	neg	no	43	IIIa	3	2	0	IDC	G2	PR	PR	AT	4		no	T
91	nd	nd	nd	nd	39	IIb	2	1	0	DCIS	nd	PR	PR	TAC	4		no	T
92	nd	nd	nd	nd	44	IV	4	2	1	IDC	G2	PR	PR	FAC, docetaxel	4 and 4		no	T
97	pos	pos	neg	no	47	IIIa	2	2	0	IDC	G3	PR	SD	TAC, FEC	4 and 3		no	T
100	neg	neg	neg	yes	47	IIIb	4	2	0	nd	nd	PR	PR	TAC	2		no	T
107	neg	neg	pos	no	45	IIIb	3	3	0	IDC	G2	PR	PR	TAC	4		no	T
108	neg	neg	neg	yes	40	IV	4	2	1	IDC	G2	SD	PR	ET	6		no	T
109	pos	neg	neg	no	33	IIIa	3	1	0	IDC	G3	PR	PR	TEC	4		no	T
112	neg	neg	neg	yes	43	IIb	1	2	0	nd	nd	PR	PR	TAC	4		no	T
115	pos	pos	neg	no	42	IIIa	3	1	0	IDC	G2	PR	PR	TAC	4		no	T
120	neg	neg	pos	no	37	IIIa	2	2	0	nd	nd	PR	PR	AT, paclitaxel, CMF	3 and 4 and 3		no	T
121	pos	pos	pos	no	42	IIIb	4	1	0	IDC	G2	PR	PR	TEC	4		no	T
122	pos	pos	neg	no	48	IV	2	0	1	nd	nd	PR	CR	TC + avastin	6		no	T
123	pos	pos	neg	no	46	IIb	2	1	0	IDC	G2	SD	PR	TEC	3		no	T
125	pos	pos	neg	no	47	IIIa	3	1	0	nd	G1	PR	PR	TAC	4		no	T
129	neg	neg	pos	no	28	IIIb	4	1	0	nd	nd	PR	PR	ТАС + herceptin	4		no	T
132	neg	neg	pos	no	38	IIIa	3	1	0	nd	nd	PR	PR	Paclitaxel + herceptin	4		no	T
135	pos	pos	neg	no	40	IIIb	4	2	0	nd	nd	CR	CR	TAC	3		no	T
138	neg	neg	neg	yes	49	IIIb	4	2	0	IDC	nd	PR	PR	AT, paclitaxel, CMF	3 and 3 and 3		no	T
147	neg	neg	neg	yes	30	IIIb	3	2	0	IDC	G3	PD	PR	FEC, TAC	2 and 2		BRCA1	T
150	neg	neg	neg	yes	37	IIIa	3	1	0	IDC	G2	PR	PR	TAC	4		BRCA1	T
153	pos	neg	neg	no	47	IIIb	4	2	0	IDC	G3	PR	PR	FEC, docetaxel	6 and 6		CHEK2	T
156	neg	neg	neg	yes	45	IIIb	4	2	0	IDC	nd	PR	PR	AT, TAC	2 and 2		no	T
157	pos	pos	pos	no	34	IIIb	1	3	0	IDC	nd	PR	PR	TAC	3		BRCA1	T
158	neg	neg	pos	no	50	IIIb	4	1	0	nd	nd	PR	PR	AT, paclitaxel, CMF	3 and 4 and 3		no	T
159	neg	neg	pos	no	50	IV	4	3	1	nd	nd	PR	PR	Paclitaxel + herceptin	9		no	T
160	neg	neg	neg	yes	39	IIIb	4	2	0	IDC	G3	PD	PD	FAC, docetaxel	6 and 2		BRCA1	T
162	pos	pos	neg	no	36	IIIb	4	1	0	nd	nd	SD	SD	TAC	2		CHEK2	T
167	pos	pos	pos	no	46	IIIb	4	2	0	nd	nd	PR	PR	Docetaxel + herceptin	3		no	T
177	neg	neg	neg	yes	40	IIIa	3	1	0	nd	nd	PR	CR	TAC	2		no	T
184	pos	pos	neg	no	42	IIb	3	0	0	IDC	G1	PR	PR	AT	6		no	T
186	neg	neg	neg	yes	49	IIIb	4	2	0	IDC	nd	PR	PR	TAC	4		no	T
187	pos	pos	neg	no	28	IIIa	2	2	0	nd	nd	PR	PR	TAC	5		no	T
189	pos	pos	neg	no	42	IIb	3	0	0	ILC	G2	PR	PR	TAC	4		no	T
193	neg	neg	neg	yes	37	IIIb	4	1	0	IDC	nd	PR	PR	TAC	4		no	T
194	neg	neg	neg	yes	48	IIIb	4	2	0	IDC	G2	PR	PR	AT	6		no	T
199	pos	pos	pos	no	38	IIa	1	2	0	nd	nd	PR	CR	AT	6		no	T
200	neg	pos	neg	no	31	IIa	2	0	0	IDC	G3	PR	PR	TAC	4		no	T
202	neg	neg	neg	yes	47	IIa	2	0	0	IDC	G3	PR	PR	TAC	4		no	T
203	neg	neg	neg	yes	47	IIIa	2	3	0	nd	nd	CR	CR	TAC	4		no	T
204	neg	neg	neg	yes	46	IIb	2	1	0	IDC	G3	PD	SD	TAC	2		BRCA1	T
206	neg	pos	neg	no	43	IIb	2	1	0	IDC	G3	PR	PR	TAC	4		no	T
207	neg	neg	neg	yes	42	IIIa	2	2	0	nd	nd	PR	PR	AT	6		no	T
209	pos	pos	neg	no	50	IIIa	3	2	0	IDC	G2	PR	PR	TAC	3		no	T
211	neg	neg	neg	yes	50	IIIa	3	2	0	IDC	G3	PR	PR	TAC	4		no	T
212	nd	nd	nd	nd	48	IIIa	4	2	0	nd	nd	CR	CR	Docetaxel	4		no	T
213	pos	pos	neg	no	24	IIIa	3	1	0	nd	nd	PR	PR	Docetaxel	4		no	T
214	nd	nd	nd	nd	48	IIIb	4	2	0	nd	nd	PR	PR	AT	6		no	T
215	neg	neg	neg	yes	37	IIIb	4	2	0	nd	nd	PR	PR	AT + herceptin	4		no	T
216	pos	pos	neg	no	37	IIIa	3	1	0	nd	G2	PR	PR	TAC	4		no	T
217	pos	pos	neg	no	45	IIb	2	1	0	nd	nd	PR	PR	Docetaxel	4		no	T
218	pos	pos	neg	no	48	IIIb	4	1	0	IDC	nd	PR	PR	AT	6		no	T
219	neg	neg	pos	no	36	IIIa	2	2	0	nd	nd	PR	PR	TAC	2		no	T
220	pos	pos	neg	no	48	IIIb	4	1	0	IDC	G1	PR	PR	AT	6		no	T
221	neg	neg	pos	no	32	IIb	2	1	0	nd	nd	PR	CR	TAC	3		no	T
222	neg	neg	neg	yes	50	IIIb	4	3	0	nd	nd	PR	CR	TAC	4		no	T
223	neg	pos	neg	no	43	IIb	2	1	0	comedo	nd	PR	PR	AT, CMF	4 and 2		BRCA1	T
225	neg	neg	neg	yes	34	IIb	2	1	0	IDC	G3	PR	SD	AT, CMF	4 and 4		no	T
226	pos	neg	neg	no	47	IIIb	4	1	0	nd	nd	PR	PR	FEC, docetaxel	6 and 2	yes	no	T
231	pos	pos	neg	no	50	IIIa	3	2	0	IDC	G3	SD	PR	TAC	2		no	T
233	nd	nd	nd	nd	32	IIb	2	1	0	nd	nd	PR	CR	TAC	4		no	T
235	pos	pos	neg	no	36	IIIa	2	2	0	IDC	G1	PR	PR	АТ, paclitaxel, CMF	4 and 4 and 3		no	T
237	pos	pos	neg	no	38	IIIa	2	2	0	nd	nd	SD	SD	Docetaxel	3		no	T
239	neg	neg	pos	no	49	IIIa	3	1	0	IDC	nd	PR	PR	TAC	4		no	T
240	neg	neg	neg	yes	48	IIIa	2	2	0	IDC	nd	PR	PR	FEC, docetaxel	6 and 4		CHEK2	T
242	pos	pos	neg	no	25	IIIa	3	1	0	IDC	G2	PR	PR	AT	5		no	T
243	neg	neg	neg	yes	46	IIIa	3	2	0	nd	nd	CR	CR	TEC	4		no	T
251	pos	neg	neg	no	43	IIIb	4	2	0	nd	nd	PR	CR	TAC	5	yes	no	T
252	pos	pos	neg	no	49	IIIa	3	2	0	nd	nd	PR	PR	TAC	2		no	T
254	pos	pos	neg	no	37	IIIb	4	2	0	nd	nd	PR	PR	TAC	3		no	T
255	nd	nd	nd	nd	44	IIb	2	1	0	IDC	nd	PR	PR	TAC	5		no	T
257	pos	pos	neg	no	48	IIIb	4	1	0	nd	nd	SD	SD	FEC, docetaxel	6 and 4		no	T
259	pos	pos	neg	no	39	IIIb	4	2	0	nd	nd	PR	PR	TAC	2		no	T
261	neg	pos	neg	no	30	IIIa	3	2	0	nd	nd	PR	PR	TAC	2		no	T
264	pos	pos	neg	no	29	IIb	2	1	0	nd	nd	PR	PR	AT	4		no	T
266	neg	neg	neg	yes	46	IV	3	1	1	Secretory	nd	SD	SD	AC, docetaxel	4 and 2		no	T
267	nd	nd	nd	nd	40	IIIa	2	2	0	nd	nd	SD	SD	Docetaxel	2		no	T
268	neg	neg	neg	yes	45	IIIb	4	2	0	nd	nd	PR	PR	TCbP, FEC	4 and 4		no	T
269	neg	neg	neg	yes	30	IIIa	2	2	0	DCIS	nd	CR	CR	AT	4		no	T
270	neg	neg	neg	yes	41	IIIa	3	2	0	IDC	G2	PR	PR	TAC	2		no	T
273	pos	pos	neg	no	38	IIIa	3	1	0	IDC	nd	PR	PR	TAC	2		no	T
276	neg	neg	pos	no	43	IIIa	3	2	0	IDC	G3	PR	PR	TAC	4		no	T
278	pos	pos	neg	no	31	IIIa	2	2	0	IDC	G2	PR	PR	FAC, TAC	3 and 4		no	T
281	neg	neg	neg	yes	43	IIIb	x	2	0	nd	nd	PR	PR	TAC	4		no	T
283	pos	pos	neg	no	47	IIIa	3	2	0	IDC	G1	PR	PR	TAC	4		no	T
284	neg	pos	neg	no	31	IIIa	3	1	0	IDC	G2	SD	PR	TAC	4		no	T
289	pos	pos	pos	no	23	IIIa	2	2	0	IDC	G3	PR	SD	TAC	2		no	T
294	pos	neg	neg	no	42	IIIa	3	1	0	ILC	G3	PR	PR	TAC	4		no	T
301	pos	pos	pos	no	32	IIIb	4	1	0	ILC	G1	PR	PR	Lapatinib, paclitaxel	18 and 12		no	T
302	neg	neg	pos	no	47	IIIb	2	3	0	IDC	G3	PR	PR	Docetaxel, herceptin + avastin	12 and 15		no	T
303	pos	pos	pos	no	49	IIIb	4	1	0	nd	nd	PR	PR	Docetaxel	6		no	T
304	pos	pos	neg	no	41	IIb	2	1	0	nd	nd	PR	PR	AT	5		no	T
305	neg	neg	pos	no	48	IIIb	4	1	0	nd	nd	PR	PR	FAC, paclitaxel + herceptin	5 and 2		no	T
306	pos	pos	neg	no	38	IIIa	3	1	0	ILC	nd	PR	PR	AT	4		no	T
308	neg	neg	neg	yes	38	IIb	3	0	0	nd	nd	PR	PR	TAC	2		no	T
310	pos	pos	neg	no	41	IIIb	4	1	0	IDC	nd	PR	PR	FAC, TAC	2 and 4		no	T
312	pos	pos	neg	no	45	IIb	2	1	0	nd	nd	SD	SD	Docetaxel	6		no	T
322	pos	pos	neg	no	50	IIb	2	1	0	ILC	G2	PR	PR	AT, CMF	4 and 4		no	T
326	nd	nd	nd	nd	47	IIIa	3	1	0	nd	nd	PR	PR	AT, CMF	4 and 4		no	T
335	neg	neg	pos	no	42	IIIb	4	0	0	IDC	nd	PR	PR	AT, paclitaxel, CMF	3 and 4 and 3		no	T
346	nd	nd	nd	nd	44	IIIb	4	1	0	nd	nd	PR	PR	AT, paclitaxel, CMF	4 and 4 and 3		no	T
359	neg	neg	neg	yes	47	IIIb	4	1	0	IDC	nd	PR	PR	FAC, docetaxel	4 and 4		no	T
364	nd	nd	nd	nd	48	IIIa	2	3	0	nd	nd	PR	CR	Vinorelbine + AC	5		no	T
368	nd	nd	nd	nd	46	IIIa	3	1	0	nd	nd	SD	SD	Vinorelbine + paclitaxel	4		no	T
398	nd	nd	nd	nd	33	IIIa	2	2	0	IDC	G2	PR	SD	AT, paclitaxel, CMF	3 and 4 and 3		no	T
418	nd	nd	nd	nd	40	IIb	2	2	0	nd	nd	PR	PR	Vinorelbine + capecitabine	3		no	T
421	nd	nd	nd	nd	39	IIIb	4	2	0	IDC	G2	PR	PR	AT	10		no	T
433	pos	neg	pos	no	46	IIIb	4	1	0	IDC	G2	PR	PR	AT, paclitaxel, CMF	3 and 4 and 3		no	T
442	pos	pos	neg	no	43	IIIb	4	2	0	nd	nd	PR	PR	TAC	3		no	T
456	pos	pos	neg	no	41	IIIb	4	1	0	IDC	G3	PR	PR	TAC	4		no	T
1836	pos	neg	neg	no	50	IIIa	3	1	0	nd	nd	PR	PR	TAC	4		no	T
