# Supplementary material for: Breast cancer sensitivity to neoadjuvant therapy in BRCA1 and CHEK2 mutation carriers and non-carriers
Source: Springer Nature journal article supplement (doi:10.1007/s10549-014-3206-1), 2014-11-21
Supplement: MOESM4 [file 8846762]

**Supplementary Figure 1.** Selection of patients for analysis.
